# Supplementary material for: Reversibility and two state behaviour in the thermal unfolding of oligomeric TIM barrel proteins
Source: Royal Society of Chemistry journal article supplement (doi:10.1039/c5cp01599e), 2015-01-01
Supplement: c5cp01599e1.pdf [file c5cp01599e1.pdf]

## Electronic Supplementary Information (ESI)

---

### **Reversibility and two state behavior in the thermal unfolding of oligomeric TIM barrel proteins**

**Sergio Romero-Romero<sup>1</sup>, Miguel Costas<sup>2</sup>, Adela Rodríguez-Romero<sup>3</sup> and D. Alejandro Fernández-Velasco\*<sup>1</sup>**

*1 - Laboratorio de Físicoquímica e Ingeniería de Proteínas, Departamento de Bioquímica, Facultad de Medicina, Universidad Nacional Autónoma de México, 04510 Ciudad de México, Distrito Federal, México. \**

*E-mail: fdaniel@unam.mx*

*2 - Laboratorio de Biofísicoquímica, Departamento de Físicoquímica, Facultad de Química, Universidad Nacional Autónoma de México, 04510 Ciudad de México, Distrito Federal, México.*

*3 - Laboratorio de Química de Biomacromoléculas 3, Departamento de Química de Biomacromoléculas, Instituto de Química, Universidad Nacional Autónoma de México, 04510 Ciudad de México, Distrito Federal, México.*

## Table of Contents:

|                                                                                                                                      |                  |
|--------------------------------------------------------------------------------------------------------------------------------------|------------------|
| <b>Table of Contents</b> .....                                                                                                       | <b>p. S2-S3</b>  |
| <b>Fig. S1:</b> Phylogenetic representations of BacTIMs.....                                                                         | <b>p. S4</b>     |
| <b>Fig. S2:</b> Far-UV CD spectra of BacTIMs at 25 °C .....                                                                          | <b>p. S5</b>     |
| <b>Fig. S3:</b> Intrinsic tryptophan fluorescence spectra of BacTIMs .....                                                           | <b>p. S6</b>     |
| <b>Fig. S4:</b> Dependence of the $T_m$ with respect to scan rate for BacTIMs .....                                                  | <b>p. S7</b>     |
| <b>Fig. S5:</b> Far-UV CD spectra of BacTIMs at 80 °C .....                                                                          | <b>p. S8</b>     |
| <b>Fig. S6:</b> Amino acid sequence alignment<br>of diverse TIMs used for comparison.....                                            | <b>p. S9-S10</b> |
| <b>Table S1:</b> Data collection and refinement statistics<br>of <i>Go</i> TIM, <i>Dr</i> TIM, <i>Sc</i> TIM and <i>Cp</i> TIM ..... | <b>p. S11</b>    |
| <b>Table S2:</b> Dimeric TIM PDB files used<br>in the structural comparison of IrrevTIMs and RevTIMs. ....                           | <b>p. S12</b>    |
| <b>Table S3:</b> Thermodynamic parameters<br>of irreversible thermal unfolding of <i>Np</i> TIM and <i>Go</i> TIM.....               | <b>p. S13</b>    |
| <b>Table S4:</b> Matrix with identity sequence percentage<br>and average RMSD values for IrrevTIMs and RevTIMs .....                 | <b>p. S14</b>    |

|                                                                                                              |                   |
|--------------------------------------------------------------------------------------------------------------|-------------------|
| <b>Table S5:</b> Amino acidic composition used<br>in the sequence comparison of IrrevTIMs and RevTIMs.....   | <b>p. S15</b>     |
| <b>Table S6:</b> Secondary structure elements<br>and stabilizing interactions for IrrevTIMs and RevTIMs..... | <b>p. S16</b>     |
| <b>References for Electronic Supplementary Information.....</b>                                              | <b>p. S17-S18</b> |

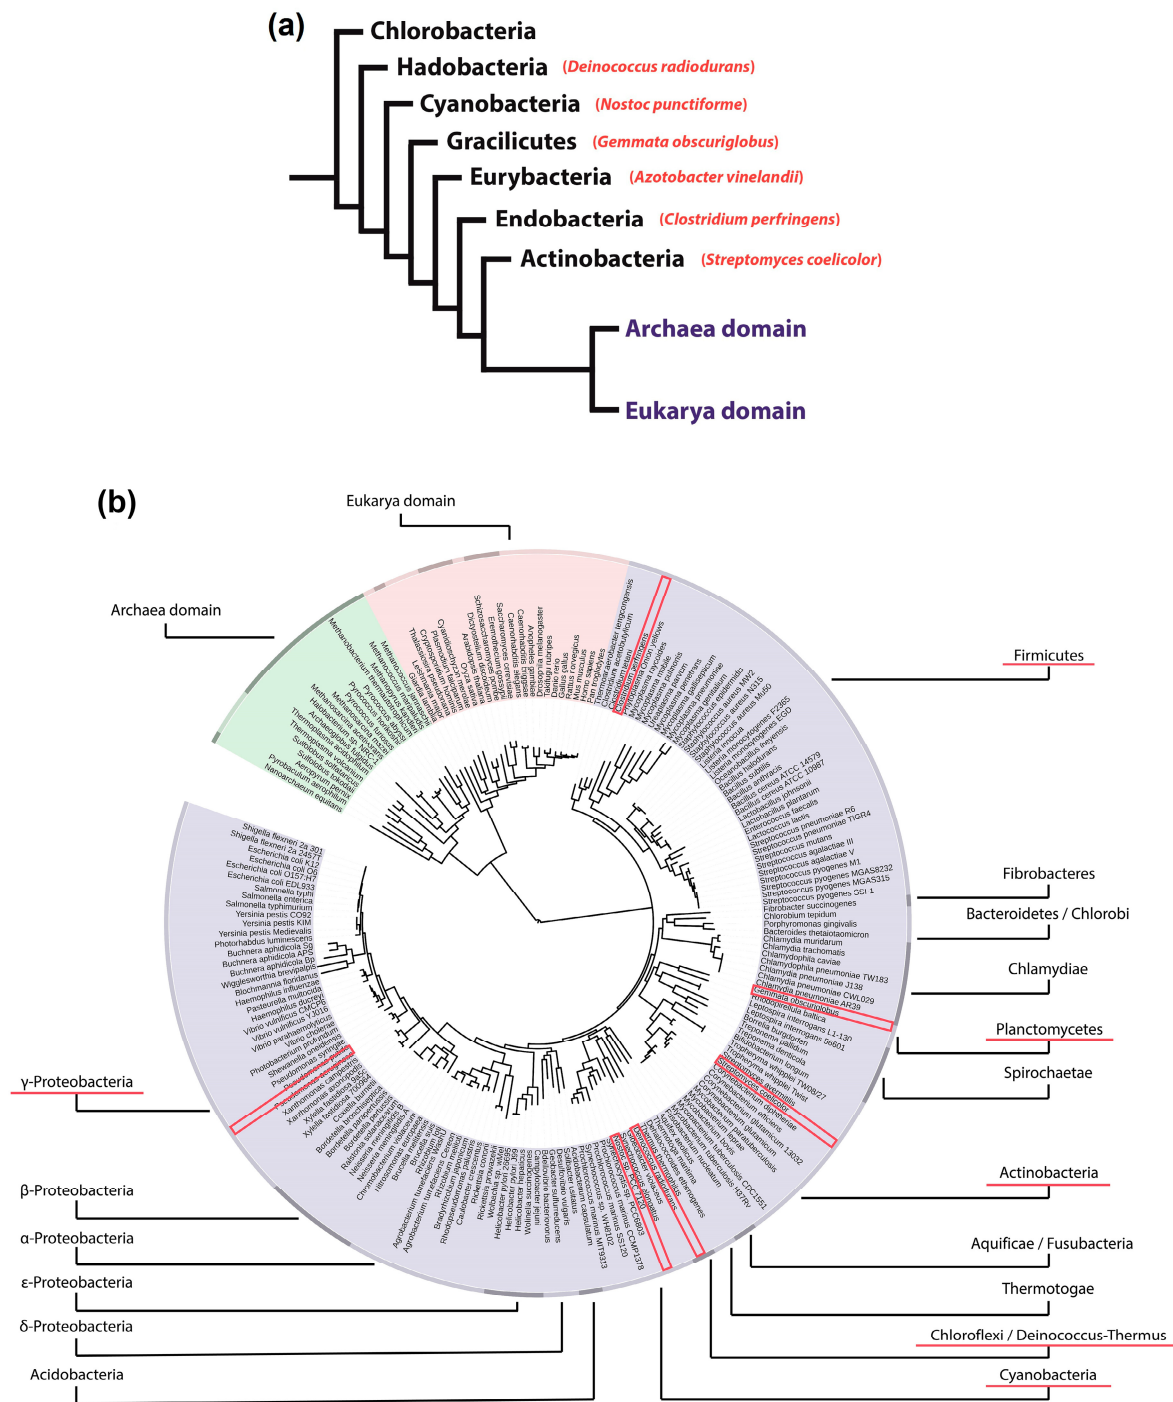

**Fig. S1.** Phylogenetic representations of BacTIMs. **(a)** Cladogram of bacterial supertaxa (according to ref. 1) showing the species from which the indicated TIM sequence was studied. **(b)** Phylogenetic tree showing the TIMs studied in this work (modified from ref. 2). For *Av*TIM phylum ( $\gamma$ -Proteobacteria) only an approximate location in the phylogenetic tree is shown.



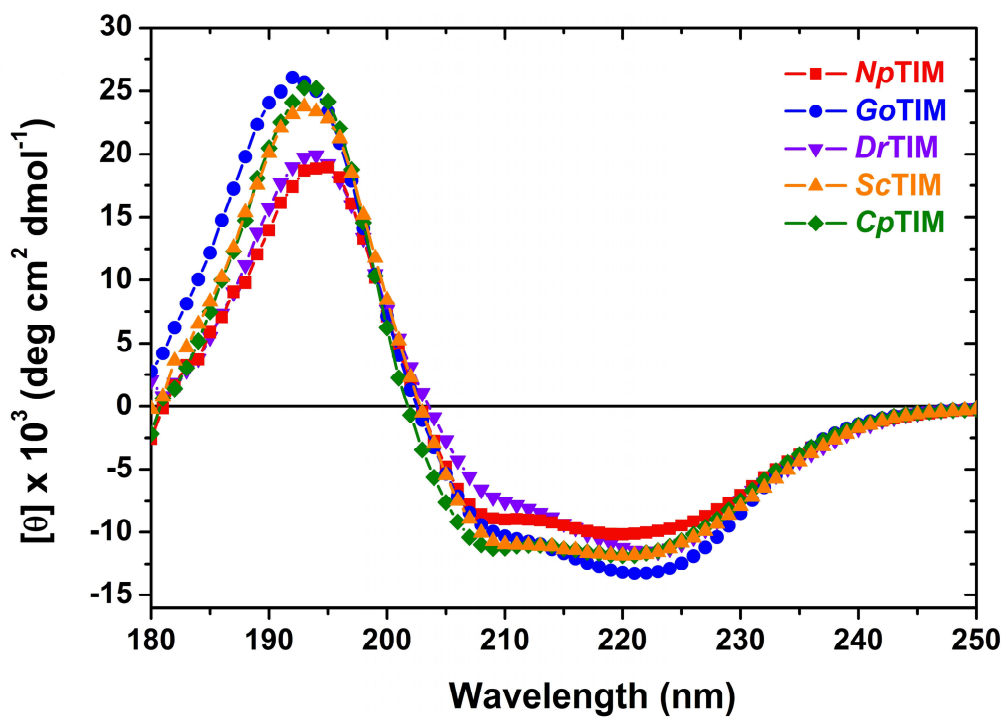

**Fig. S2.** Far-UV CD spectra of BacTIMs at 25 °C. Data shown are the average of five scans recorded using a protein concentration of 15  $\mu$ M in buffer C (10 mM NaH<sub>2</sub>PO<sub>4</sub> pH 8.0).

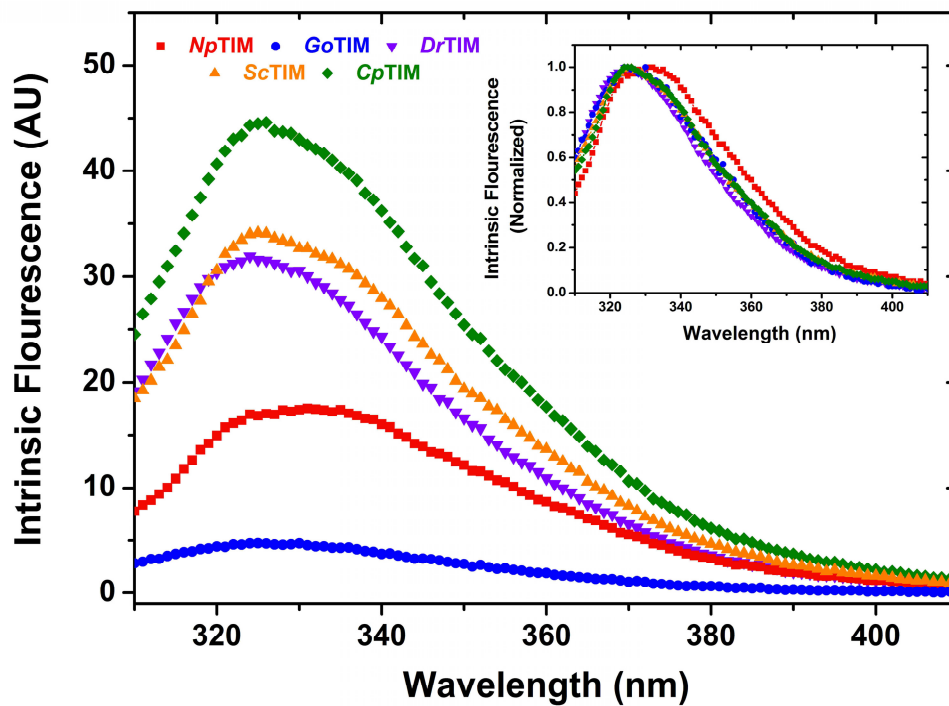

**Fig. S3.** Intrinsic tryptophan fluorescence spectra of BacTIMs. The spectra shown are the average of five scans recorded using a protein concentration of 15  $\mu$ M at 25  $^{\circ}$ C in buffer C (10 mM  $\text{NaH}_2\text{PO}_4$  pH 8.0). The excitation wavelength was 295 nm. The inset shows normalized data.

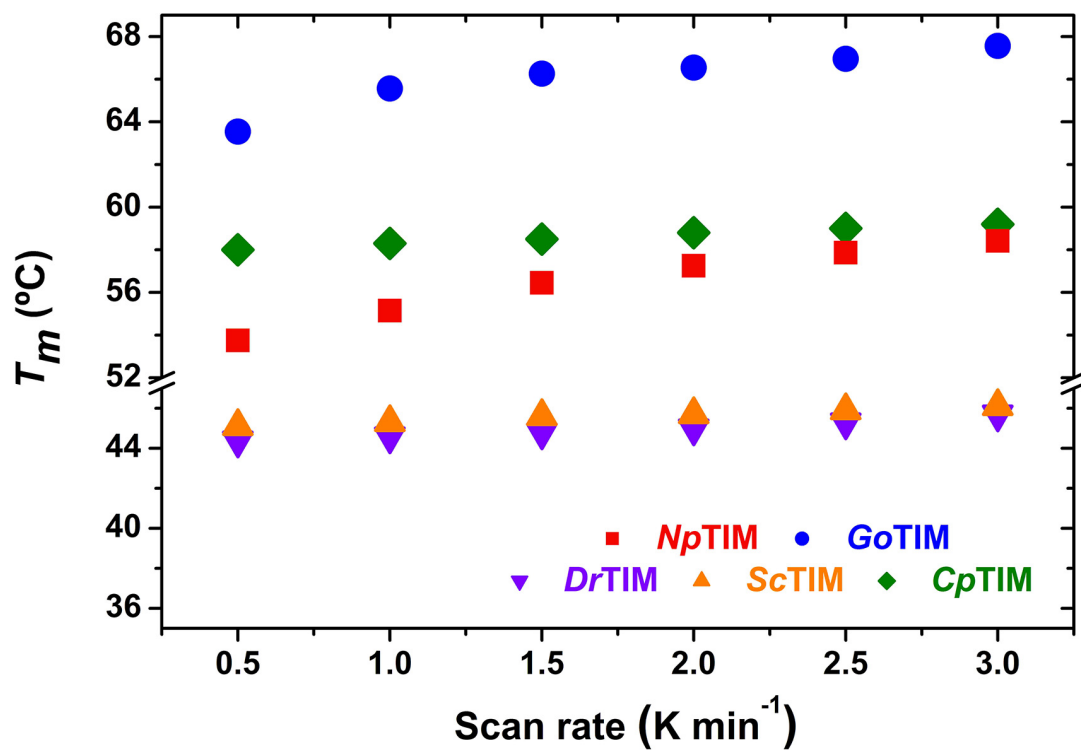

**Fig. S4.** Dependence of the  $T_m$  with respect to scan rate for BacTIMs. In all experiments, protein concentration was 15  $\mu\text{M}$ .

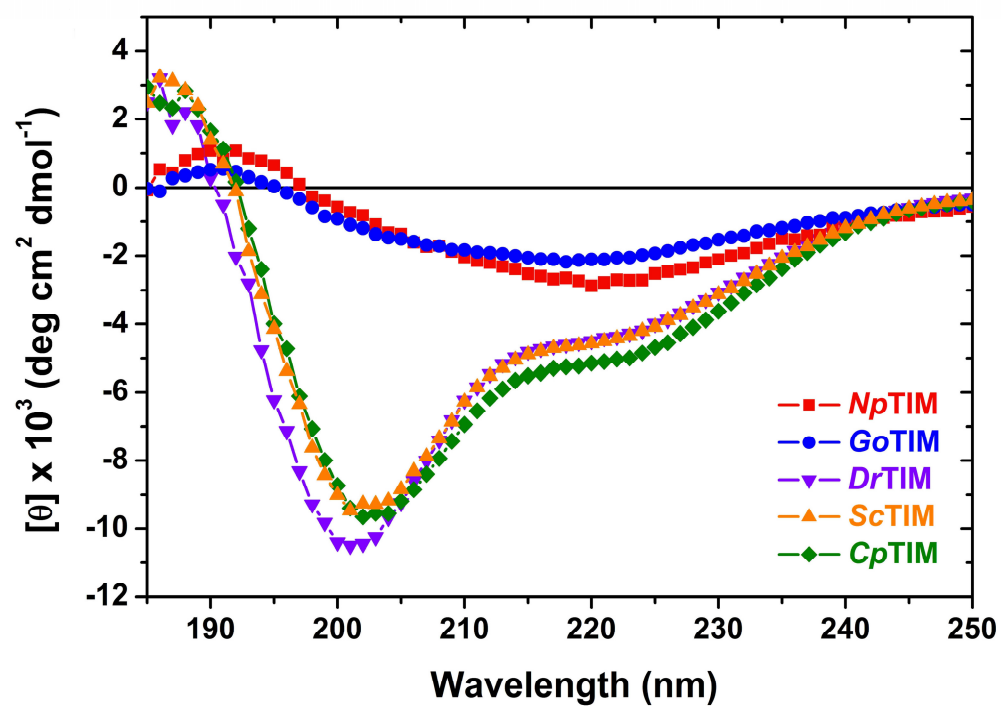

**Fig. S5.** Far-UV CD spectra of BacTIMs at 80 °C. Data shown are the average of five scans recorded using a protein concentration of 15  $\mu\text{M}$  in buffer C (10 mM  $\text{NaH}_2\text{PO}_4$  pH 8.0).

```

.....EcTIM..... 1 . . . MRHPLVMGNWKLN . GSRHMVHEL VSNLRK . . . ELAGV . . AGCAVA I APPEMY IDMAKREA . . . EGS HIM 60
.....EhTIM..... 1 . MSARKFVVGGNWKC N . GT LAS IET LTKGVAASVDAELA . . . KKVEV I VGVPF I Y I PKVQQ I LAGEANGAN I L 68
.....GgTIM..... 1 MAP . RKFFVVGGNWKM N . GDKKSLGEL IHTLNG . . . AKLS . . . ADTEVVCGAPS I YLDFARQKL . . . . . DAK I G 60
.....GtTIM..... 1 . MPARRPF I GGNFKCN . GS LDF I KSHVAA IAA . . . HK I P . . . DSVDV V I APSAVHLSTA I AAN . . . . . TSKQLR 61
.....GsTIM..... 1 . . . MRKPI I AGNWKMH . KT LAEAVQFVEDVKG . . . HVPPA . . . DEVI SVVCA PFL FLDRLVQAA . . . . . DGTDLK 60
.....HsTIM..... 1 MAPSRKFFVVGGNWKM N . GRKQSLGEL I GTLNA . . . AKVP . . . ADTEVVCAPPTAY I D FARQKL . . . . . DPK I A 61
.....LmTIM..... 1 MSAKPQP I A AANWKC N . GTTAS IEKLVQVFNE . . . HT I S . . . HDVQC VVAPT FVH I PLVQAKL . . . . . RNPKYV 62
.....MmTIM..... 1 . . . MRHPVVMGNWKL N . GSKEMVVD LNLGNA . . . ELEGV . . . TGVDVAVAPPAL FVDLAERT LT . . . EAGSA I I 62
.....MtTIM..... 1 . . . MSRKPL I AGNWKMN . LNHYEA IALVQK IAF . . . SLPDKYYDRVDVAV I PPF TDLRSVQTLV . . . . . DGDKLR 63
.....OcTIM..... 1 MAPSRKFFVVGGNWKM N . GRKKNLGEL I ETLNA . . . AKVP . . . ADTEVVCAPPTAY I D FARQKL . . . . . DPK I A 61
.....PftTIM..... 1 . . . MARKYFVAANWKC N . GTLES I KSLTNSFN N . . . LDFDP . . . SKLDVVVFPVSVHYDHRKLL . . . . . QSKFS 60
.....SsTIM..... 1 MAPARKFFVVGGNWKM N . GRKNNLGEL I INTLNA . . . AKLP . . . ADTEVVCAPPTAY I D FARQKL . . . . . DPK I A 61
.....TbTIM..... 1 . MSKPQP I A AANWKC N . GSQQSLSEL I DLFNS . . . TS I N . . . HDVQC VVAST FVH LAMTKERL . . . . . SHPKFV 61
.....TcTIM..... 1 MASKPQP I A AANWKC N . GSESLVPL I ETLNA . . . ATFD . . . HDVQC VVAPT FLH I PMTKARL . . . . . TNPKFQ 62
.....TsTIM..... 1 . . . MTRKFLVVGGNWKM N . GSYSH INTFFDTLQK . . . ADTD . . . PNAD I V I GVPACYLKYAQDKA . . . . . PKGIK 59
.....TvTIM..... 1 . . . MRTFFVVGGNWKA NPKTVEEAEL I EMLNG . . . AKVE . . . GNVEVVVAAPF I FLPTLQKQL . . . . . RKDWK 59
.....YtTIM..... 1 . . . MARTFFVVGGNFKLN . GSKQS I KE I VERLNT . . . AS I P . . . ENVEV V ICPPATYLDYSVSLV . . . . . KKPQVT 60
.....NpTIM..... 1 . . . MRK I V I AGNWKMF . KTQAETQEF LQGF L P . . . HLEETP . QGREV I LCPPFTDLSVLSKTL . . . . . HGSL I Q 61
.....GoTIM..... 1 . . . MPTRKKFVAGNWKMN . TTLAEAKALGA AVAK . . . GVTD . . . DRVTVAVFPYPWLTA VGEVL . . . . . KGSPVA 61
.....DrTIM..... 1 . . . MQTLLALNWKMN . KPTPEARSWAELTT . . . KYAPA . . . EGVDLAVLAPALDLSALANL . . . . . PAG I A 58
.....ScTIM..... 1 . . . MTRTPTLMAGNWKMN . LNHLEA IAHVQKLA F . . . ALADKDYDAVEVA VLAPFTDLRSVQTLV . . . . . DGDK LK 64
.....CpTIM..... 1 . . . MRTPI I AGNWKMH . YTI DEAVK LVEELKP . . . LVKD . . . AKCEVVVCPT FVCLDAVKKAV . . . . . EGTN I K 59

```

```

Consensus R K F F V A G N W K L N G L L N A V E V V V A P P L D L L L K E
M+PMRKPFVAGNWKMN -GTKAEA+ELVETLNA - -AKI+- -YADVEVVVAPPFVYLDFAQQKL - - - -DGPKI+

```

```

.....EcTIM..... 61 L . . GAQNVLDNL SGAFTGET SAAMLKD IGAQY I I I GHSERRTYHKESEDEL IAKKFAVLKEQGLTFVLCI GETE 131
.....EhTIM..... 69 V . . SAENAW . TKSGAYTGEVHVGM L VDCQVYV I I L GHSERRQ I FHESNEQVAEKVKVA I DAGLKV IAC I GETE 138
.....GgTIM..... 61 V . . AAQNCYKVPKG AFTGE I SPAM I KD IGAAW I L GHSERRH V FGESEDEL I GQKVAHALAEGLGV IAC I GEKL 131
.....GtTIM..... 62 I . . AAQNVYLEGNGAWTGETS VEM LQDMGLKHV I V GHSERR I MGETDEQS AKKAKRAL EKGMTV I FCVGETL 132
.....GsTIM..... 61 I . . GAQTMHFADQGA YTTGEVSPVMLKDLGVTYV I L GHSERRQMF AETDETVNKKVLA AFTRGL I P I ICCGESL 131
.....HsTIM..... 62 V . . AAQNCYKVTNGAFTGE I SPGMIKDCGATWVVLGHSERRH V FGESEDEL I GQKVAHALAEGLGV IAC I GEKL 132
.....LmTIM..... 63 I . . SAENA I . AKSGAFTGEVSPM I LKD IGVHVV I L GHSERRTY YGETDE I VAQKVSEACKQGFV IAC I GETL 132
.....MmTIM..... 63 L . . GAQNTDLNNSGAFTGDMSPAM LKEFGATH I I I GHSERR EYHAESEDFVAKKFAFLKENGLTPVLCI GESD 133
.....MtTIM..... 64 LTYGAQDLSPHDSGAYTGDVSGAFLAKLGC SYVVVGH SERRTYHNEDDALVAAKAAT ALKHGLTP IVC I GEHL 136
.....OcTIM..... 62 V . . AAQNCYKVTNGAFTGE I SPGMIKDCGATWVVLGHSERRH V FGESEDEL I GQKVAHALAEGLGV IAC I GEKL 132
.....PftTIM..... 61 T . . GIQNVSKFGNGSYTGEVSAE IAKDLN I EYV I I GHSERRR YFHETDE D VREK LQASL KNNLKA VVCFGESL 131
.....SsTIM..... 62 V . . AAQNCYKVANGAFTGE I GPGMIKDLGATWVVLGHSERRH V FGESEDEL I GQKVAHALAEGLGV IAC I GEKL 132
.....TbTIM..... 62 I . . AAQNA I . AKSGAFTGEVSLP I LKDFGVNWI V L GHSERRA Y YGETNE I VADKVA AVASGFV IAC I GETL 131
.....TcTIM..... 63 I . . AAQNA I . TRSGAFTGEVSLQ I LKDYGIK WVV L GHSERR L Y YGETNE I VAEKVAQACAGFHV IVCVGETN 132
.....TsTIM..... 60 I . . AAENCYKVGSGAFTGE ISTEM I KDCGCEWV I L GHSERRH I FGESEDEL I GEKVKHALDSGLNV I PC I GELL 130
.....TvTIM..... 60 V . . SAENVFTKPNGAFTGEVTVPM I KSFGEIWT I L GHSERRD I LKEDDEF LAAKAKFAL ENGMK I I YCCGEHL 130
.....YtTIM..... 61 V . . GAQNAYLKASGAFTGENSVDQ I KDVGAKW I L GHSERRS YFHEDDKF IADKTKFALGQGVGV ILC I GETL 131
.....NpTIM..... 62 L . . GAQNIHWEEFGAYTGE I SGPM LTESGVRFV I V GHSERRQ YFGETDATVNLRLRTAQRFG LTP I LCVGETK 132
.....GoTIM..... 62 L . . GAQDVSEKKG AFTGEVSPAM LLETGCKYAL I GHSERRH I I G ESETF I NHKVHTALEEGLSVVLCMGETL 132
.....DrTIM..... 59 F . . GGQDVSAHESGAYTGE I SAAMLKDAGASC VVVGH SERR EYHDES DATVA AKARQAQANGLLP I VCVGENL 129
.....ScTIM..... 65 I KYGAQD I SAHDGGA YTTGE I SGPM LAKLKCTYVAVGH SERRQYH AETDE I VNAKVKAA YKHGLTP I LCVGEEL 137
.....CpTIM..... 60 V . . GAQNMHFEKGAFTGE I APRMLEAMN I D YV I I GHSERR EYFNETDETCNKVKAAFAHNLTP I LCCGETL 130

```

```

Consensus <AQN <GAFTGE S MLKD G <V I L GHSERR Y F G E D E V A K V A A L G L V I C G E L
V -YGAQNVYKVKSGAFTGE+SPAM LKDLGATW I L GHSERRHYFGESEDELVA+KVA+ALAEGLTV I +C I GETL

```

Continue in the next page...



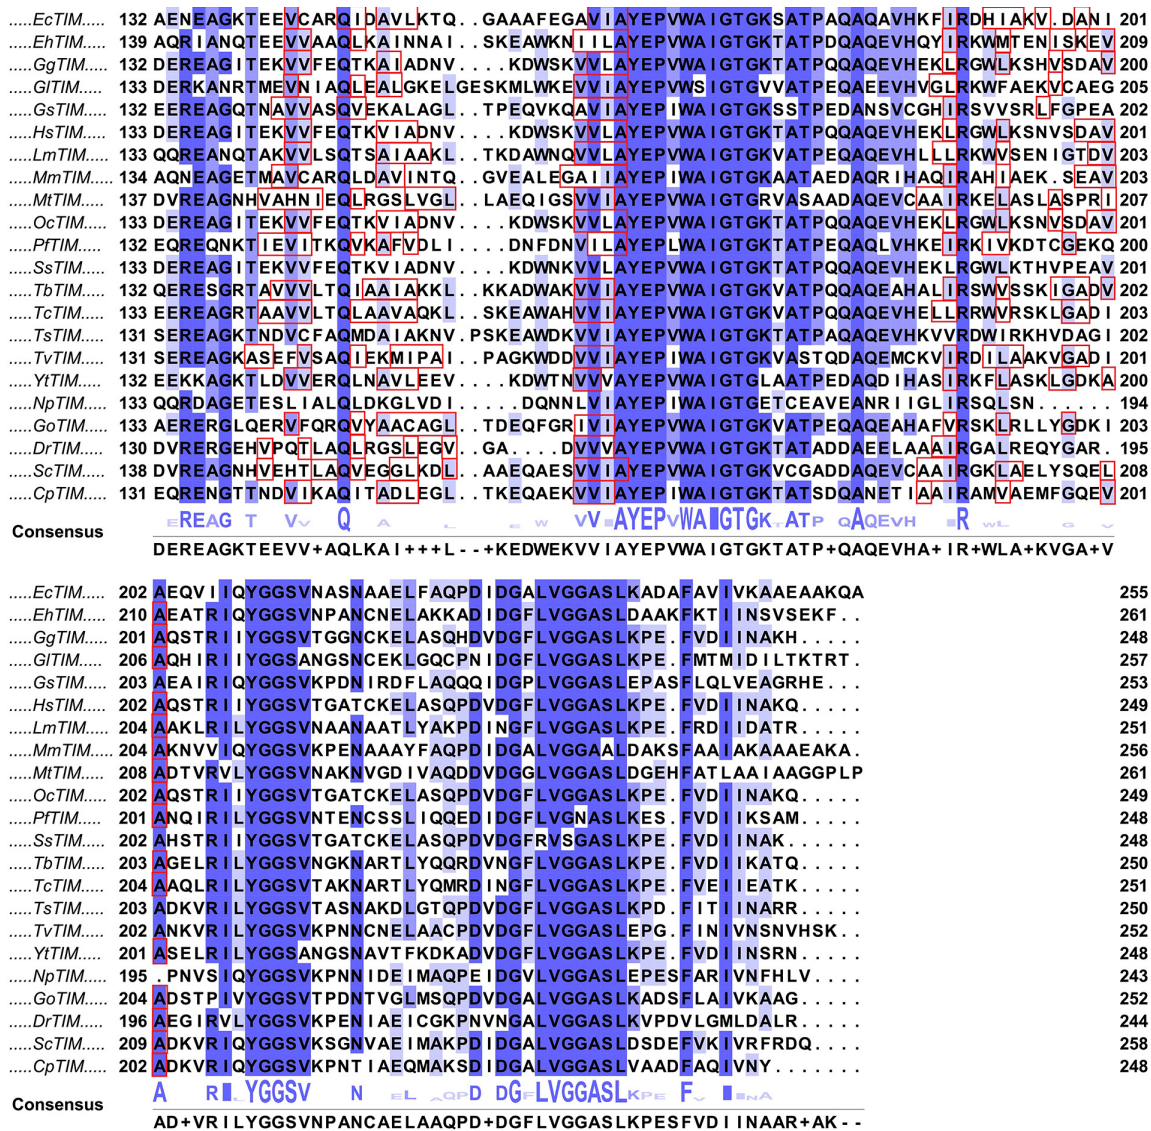

**Fig. S6.** Sequence alignment of diverse TIMs used for comparison. The conserved residues in these TIMs are shown on the *consensus line* and represented from blue light to dark in accordance to increase conservation. In red squares are shown the residues (both internal and boundary) involved in the formation of the biggest cavity in these structures, except for *NpTIM*, *SsTIM* and *TsTIM* for which there is not structural data reported.

**Table S1.** Thermodynamic parameters for the irreversible thermal unfolding of *Np*TIM and *Go*TIM.

| Thermodynamic parameter                                                                                              | Bacterial TIMs     |               |                            | Eukaryotic TIMs            |                            |                            |                            |
|----------------------------------------------------------------------------------------------------------------------|--------------------|---------------|----------------------------|----------------------------|----------------------------|----------------------------|----------------------------|
|                                                                                                                      | <i>Np</i> TIM      | <i>Go</i> TIM | <i>Gl</i> TIM <sup>a</sup> | <i>Hs</i> TIM <sup>a</sup> | <i>Lm</i> TIM <sup>b</sup> | <i>Tb</i> TIM <sup>b</sup> | <i>Tc</i> TIM <sup>b</sup> |
| Activation free energy (kJ mol <sup>-1</sup> ) from average of individual fits to DSC thermograms (Eqs. (3) and (4)) | 368 ± 46           | 716 ± 63      | NR                         | NR                         | 312 ± 5                    | 397 ± 5                    | 809 ± 7                    |
| Activation free energy (kJ mol <sup>-1</sup> ) from Arrhenius plot (Eq. (2))                                         | 368 ± 17           | 716 ± 25      | 367 ± 7                    | 361 ± 4                    | 315 ± 3                    | 398 ± 5                    | 793 ± 18                   |
| Activation free energy (kJ mol <sup>-1</sup> ) from consistency test using several scanning rates (Eq. (5))          | 343 ± 21           | 715 ± 88      | NR                         | NR                         | 347 ± 39                   | 420 ± 55                   | 715 ± 137                  |
| Activation free energy average (kJ mol <sup>-1</sup> )                                                               | 360 ± 25           | 715 ± 46      | NR                         | NR                         | 325 ± 21                   | 406 ± 29                   | 774 ± 75                   |
| $m^\ddagger$ (kJ mol <sup>-1</sup> M <sup>-1</sup> )                                                                 | 1.67               | 8.12          | 3.94                       | 2.77                       | 1.47                       | 1.69                       | 8.32                       |
| $m_{eq}$ (kJ mol <sup>-1</sup> M <sup>-1</sup> )                                                                     | 27.95 <sup>c</sup> | 27.77         | 30.02                      | 30.09                      | 30.80                      | 30.35                      | 30.67                      |
| $m^\ddagger / m_{eq}$                                                                                                | 0.06               | 0.29          | 0.13                       | 0.09                       | 0.05                       | 0.06                       | 0.27                       |
| Number of residues unfolded in the transition state <sup>d</sup>                                                     | 30                 | 148           | 67                         | 45                         | 24                         | 28                         | 136                        |

<sup>a</sup> From Ref. 18. <sup>b</sup> From Ref. 19. <sup>c</sup> Because the structure of *Np*TIM is not known, the  $\Delta$ ASA value used for the calculation of  $m_{eq}$  is the average of  $\Delta$ ASA from all three-dimensional structures employed for structural comparison ( $57388 \pm 1365$  Å<sup>2</sup>; Table 4). <sup>d</sup> Calculated from:  $N_r(m^\ddagger/m_{eq})$ , where  $N_r$  is the total number of residues in the dimeric protein, and  $m^\ddagger/m_{eq}$  is the degree of unfolding as estimated from the urea  $m$  values. NR: value not reported.

**Table S2.** Data collection and refinement statistics of *Go*TIM, *Dr*TIM, *Sc*TIM and *Cp*TIM.

| Data collection <sup>a</sup>              |                        |                        |                        |                        |
|-------------------------------------------|------------------------|------------------------|------------------------|------------------------|
|                                           | <i>Go</i> TIM          | <i>Dr</i> TIM          | <i>Sc</i> TIM          | <i>Cp</i> TIM          |
| PDB ID                                    | 4Y96                   | 4Y90                   | 4Y9A                   | 4Y8F                   |
| Resolution range (Å)                      | 36.36-1.58 (1.64-1.58) | 36.13-2.09 (2.17-2.09) | 43.03-2.29 (2.37-2.29) | 37.59-1.54 (1.59-1.54) |
| Space group                               | P 6 <sub>5</sub> 2 2   | R 3 2                  | P 4 <sub>3</sub>       | C 1 2 1                |
| Unit cell dimensions                      |                        |                        |                        |                        |
| a, b, c, (Å)                              | 124.8, 127.8, 134.2    | 169.6, 169.6, 202.3    | 86.1, 86.1, 134.0      | 75.3, 49.6, 71.5       |
| α, β, γ, (°)                              | 90.0, 90.0, 120.0      | 90.0, 90.0, 120.0      | 90.0, 90.0, 90.0       | 90.0, 120.0, 90.0      |
| Total reflections                         | 779530 (107888)        | 261090 (36321)         | 128420 (19245)         | 142402 (17348)         |
| Unique reflections                        | 81335 (8192)           | 64962 (6342)           | 43475 (4241)           | 33930 (3130)           |
| Multiplicity                              | 9.6 (9.0)              | 4.0 (3.9)              | 3.0 (3.1)              | 4.2 (3.7)              |
| Completeness (%)                          | 99.3 (97.1)            | 99.7 (98.6)            | 99.7 (98.1)            | 99.2 (94.4)            |
| Mean I / sigma (I)                        | 29.0 (4.8)             | 11.0 (2.9)             | 10.0 (3.0)             | 14.6 (3.1)             |
| R-merge                                   | 0.040 (0.487)          | 0.097 (0.464)          | 0.071 (0.371)          | 0.062 (0.448)          |
| Refinement statistics                     |                        |                        |                        |                        |
|                                           | <i>Go</i> TIM          | <i>Dr</i> TIM          | <i>Sc</i> TIM          | <i>Cp</i> TIM          |
| R <sub>work</sub> / R <sub>free</sub> (%) | 17.8 / 20.1            | 13.8 / 18.6            | 23.1 / 28.2            | 14.8 / 18.1            |
| Average B-value (Å <sup>2</sup> )         | 24.9                   | 25.9                   | 35.8                   | 16.6                   |
| Protein                                   | 23.1                   | 24.8                   | 35.9                   | 14.1                   |
| Ligand                                    | 32.8                   | 49.3                   | ---                    | 31.5                   |
| Solvent                                   | 35.2                   | 33.2                   | 32.7                   | 29.5                   |
| Number of atoms                           | 4446                   | 8069                   | 7943                   | 2362                   |
| Protein                                   | 3777                   | 7142                   | 7690                   | 1977                   |
| Ligand                                    | 14                     | 87                     | ---                    | 11                     |
| Water                                     | 639                    | 832                    | 250                    | 372                    |
| Protein residues                          | 500                    | 976                    | 1018                   | 251                    |
| RMS (bonds) (Å)                           | 0.007                  | 0.011                  | 0.009                  | 0.010                  |
| RMS (angles) (°)                          | 1.11                   | 1.30                   | 1.33                   | 1.24                   |
| Ramachandran favored (%)                  | 98.43                  | 97.74                  | 96.15                  | 98.47                  |
| Ramachandran allowed (%)                  | 1.18                   | 1.85                   | 3.56                   | 1.15                   |
| Ramachandran outliers (%)                 | 0.39                   | 0.41                   | 0.30                   | 0.38                   |
| Clashcore                                 | 1.83                   | 1.25                   | 5.41                   | 1.76                   |

<sup>a</sup> Statistics for the highest-resolution shell are shown in parentheses.



**Table S3.** Matrix with identity sequence percentage (below) and average RMSD values (top) for IrrevTIMs and RevTIMs.<sup>a</sup>

|                              |               | RMSD values   |               |               |               |               |               |               |               |               |               |               |               |               |               |               |               |               |               |               |               |               |               |      |
|------------------------------|---------------|---------------|---------------|---------------|---------------|---------------|---------------|---------------|---------------|---------------|---------------|---------------|---------------|---------------|---------------|---------------|---------------|---------------|---------------|---------------|---------------|---------------|---------------|------|
|                              |               | IrrevTIMs     |               |               |               |               |               |               |               |               |               |               |               |               |               |               | RevTIMs       |               |               |               |               |               |               |      |
|                              |               | <i>Ec</i> TIM | <i>Eh</i> TIM | <i>Gg</i> TIM | <i>Gf</i> TIM | <i>Gs</i> TIM | <i>Hs</i> TIM | <i>Lm</i> TIM | <i>Mm</i> TIM | <i>Mt</i> TIM | <i>Oc</i> TIM | <i>Pf</i> TIM | <i>Ss</i> TIM | <i>Tb</i> TIM | <i>Tc</i> TIM | <i>Ts</i> TIM | <i>Tv</i> TIM | <i>Yf</i> TIM | <i>Np</i> TIM | <i>Go</i> TIM | <i>Dr</i> TIM | <i>Sc</i> TIM | <i>Cp</i> TIM |      |
| Identity sequence percentage | IrrevTIMs     | <i>Ec</i> TIM | -----         | 1.51          | 1.30          | 1.53          | 1.48          | 1.39          | 1.13          | 1.24          | 1.10          | 1.50          | 1.27          | 1.41          | 1.48          |               | 1.24          | 1.08          |               | 1.49          | 1.37          | 1.36          | 1.46          |      |
|                              |               | <i>Eh</i> TIM | 41            | -----         | 0.83          | 1.50          | 1.16          | 0.97          | 1.09          | 1.65          | 1.15          | 0.93          | 1.04          | 0.82          | 1.07          |               | 0.90          | 1.21          |               | 1.51          | 1.20          | 0.87          | 1.07          |      |
|                              |               | <i>Gg</i> TIM | 45            | 50            | -----         | 1.01          | 0.92          | 0.40          | 0.65          | 1.20          | 1.05          | 0.34          | 0.85          | 0.61          | 0.73          |               | 0.62          | 0.68          |               | 1.36          | 1.00          | 0.87          | 1.22          |      |
|                              |               | <i>Gf</i> TIM | 40            | 43            | 44            | -----         | 1.21          | 1.01          | 1.05          | 1.09          | 1.37          | 0.98          | 1.30          | 1.10          | 0.88          |               | 1.04          | 1.12          |               | 0.86          | 1.49          | 1.45          | 1.52          |      |
|                              |               | <i>Gs</i> TIM | 39            | 41            | 39            | 38            | -----         | 0.99          | 1.49          | 1.51          | 1.20          | 0.94          | 1.30          | 1.13          | 1.30          |               | 1.11          | 1.24          |               | 1.33          | 1.07          | 0.88          | 0.78          |      |
|                              |               | <i>Hs</i> TIM | 44            | 49            | 90            | 45            | 38            | -----         | 0.93          | 1.26          | 1.06          | 0.22          | 0.96          | ND            | 0.69          | 0.79          | ND            | 0.64          | 0.87          | ND            | 1.13          | 1.29          | 0.91          | 1.17 |
|                              |               | <i>Lm</i> TIM | 42            | 51            | 50            | 46            | 43            | 50            | -----         | 1.16          | 1.13          | 0.91          | 0.84          | 0.46          | 0.51          |               | 1.03          | 0.92          |               | 1.46          | 1.05          | 1.23          | 1.39          |      |
|                              |               | <i>Mm</i> TIM | 65            | 41            | 40            | 35            | 41            | 40            | 38            | -----         | 1.42          | 1.33          | 1.36          | 1.40          | 1.17          |               | 1.17          | 0.99          |               | 1.31          | 1.39          | 1.44          | 1.26          |      |
|                              |               | <i>Mt</i> TIM | 41            | 36            | 37            | 38            | 43            | 37            | 38            | 41            | -----         | 1.11          | 0.93          | 1.11          | 1.25          |               | 1.15          | 1.10          |               | 1.49          | 0.61          | 0.70          | 1.40          |      |
|                              |               | <i>Oc</i> TIM | 44            | 49            | 89            | 45            | 38            | 98            | 50            | 40            | 37            | -----         | 1.10          | 0.76          | 0.87          |               | 0.63          | 0.86          |               | 1.14          | 1.13          | 0.92          | 1.11          |      |
|                              | <i>Pf</i> TIM | 39            | 44            | 43            | 40            | 37            | 42            | 45            | 38            | 35            | 42            | -----         | 0.87          | 0.93          |               | 1.07          | 1.01          |               | 1.52          | 1.10          | 1.01          | 1.42          |               |      |
|                              | <i>Ss</i> TIM | 43            | 48            | 87            | 44            | 37            | 93            | 49            | 39            | 35            | 93            | 42            | -----         |               |               |               |               |               | ND            |               |               |               |               |      |
|                              | <i>Tb</i> TIM | 42            | 43            | 51            | 44            | 40            | 52            | 69            | 38            | 38            | 51            | 43            | 39            | -----         | 0.47          |               | 0.89          | 0.98          |               | 1.48          | 1.07          | 0.96          | 1.35          |      |
|                              | <i>Tc</i> TIM | 42            | 45            | 50            | 46            | 41            | 52            | 68            | 39            | 39            | 51            | 43            | 50            | 74            | -----         | ND            | 0.91          | 0.88          | ND            | 1.38          | 1.49          | 1.17          | 1.48          |      |
|                              | <i>Ts</i> TIM | 49            | 48            | 61            | 47            | 39            | 59            | 46            | 39            | 38            | 59            | 41            | 58            | 47            | 50            | -----         |               |               | ND            |               |               |               |               |      |
|                              | <i>Tv</i> TIM | 40            | 44            | 48            | 41            | 43            | 47            | 43            | 40            | 39            | 47            | 38            | 46            | 42            | 42            | 48            | -----         | 1.02          |               | 1.15          | 1.01          | 0.89          | 0.95          |      |
|                              | <i>Yf</i> TIM | 44            | 43            | 53            | 48            | 38            | 52            | 46            | 42            | 39            | 52            | 42            | 51            | 48            | 46            | 49            | 46            | -----         | ND            | 1.49          | 1.27          | 1.15          | 1.47          |      |
|                              | <i>Np</i> TIM | 39            | 38            | 37            | 33            | 47            | 36            | 36            | 43            | 40            | 36            | 33            | 35            | 34            | 32            | 34            | 38            | 35            | -----         |               |               | ND            |               |      |
|                              | <i>Go</i> TIM | 46            | 41            | 46            | 39            | 45            | 45            | 39            | 43            | 44            | 45            | 40            | 43            | 41            | 40            | 45            | 39            | 40            | 38            | -----         | 1.25          | 1.43          | 1.44          |      |
|                              | <i>Dr</i> TIM | 38            | 34            | 38            | 36            | 41            | 38            | 37            | 39            | 48            | 37            | 33            | 37            | 37            | 39            | 38            | 39            | 37            | 40            | 40            | -----         | 0.76          | 1.35          |      |
| <i>Sc</i> TIM                | 42            | 40            | 38            | 38            | 48            | 37            | 40            | 40            | 65            | 37            | 34            | 36            | 37            | 38            | 40            | 43            | 37            | 46            | 45            | 49            | -----         | 0.94          |               |      |
| <i>Cp</i> TIM                | 45            | 42            | 41            | 38            | 55            | 40            | 42            | 44            | 41            | 40            | 40            | 40            | 40            | 40            | 41            | 43            | 40            | 48            | 44            | 42            | 52            | -----         |               |      |

<sup>a</sup> ND: average RMSD value not determined because there is no structural data for *Np*TIM, *Ss*TIM and *Ts*TIM.

**Table S4.** Amino acidic composition used in the sequence comparison of IrrevTIMs and RevTIMs.

| Structural property                              | <i>Dr</i> TIM | <i>Sc</i> TIM | <i>Cp</i> TIM | Average RevTIMs | Average IrrevTIMs |
|--------------------------------------------------|---------------|---------------|---------------|-----------------|-------------------|
| <b>Amino acid composition (%)</b>                |               |               |               |                 |                   |
| Alanine (A)                                      | 17.0          | 13.6          | 12.4          | 14.3 ± 2.0      | 12.0 ± 3.1        |
| Cysteine (C)                                     | 1.2           | 1.6           | 2.4           | 1.7 ± 0.5       | 1.5 ± 0.4         |
| Aspartic acid (D)                                | 4.9           | 7.4           | 4.8           | 5.7 ± 1.2       | 4.4 ± 1.4         |
| Glutamic acid (E)                                | 8.1           | 7.4           | 9.6           | 8.3 ± 0.9       | 7.2 ± 1.3         |
| Phenylalanine (F)                                | 0.4           | 1.6           | 2.8           | 1.6 ± 1.0       | 3.2 ± 0.9         |
| Glycine (G)                                      | 10.9          | 8.9           | 7.2           | 9.0 ± 1.5       | 8.8 ± 1.4         |
| Histidine (H)                                    | 2.0           | 3.1           | 2.0           | 2.4 ± 0.5       | 2.3 ± 0.6         |
| Isoleucine (I)                                   | 3.2           | 5.0           | 8.0           | 5.4 ± 1.9       | 6.9 ± 1.2         |
| Lysine (K)                                       | 3.6           | 7.0           | 7.6           | 6.1 ± 1.7       | 6.9 ± 1.8         |
| Leucine (L)                                      | 10.1          | 8.5           | 4.8           | 7.8 ± 2.2       | 7.1 ± 1.3         |
| Methionine (M)                                   | 1.6           | 1.9           | 3.2           | 2.2 ± 0.7       | 1.6 ± 0.7         |
| Asparagine (N)                                   | 3.2           | 2.3           | 4.8           | 3.4 ± 1.0       | 4.0 ± 1.2         |
| Proline (P)                                      | 4.0           | 2.3           | 2.8           | 3.1 ± 0.7       | 3.5 ± 0.9         |
| Glutamine (Q)                                    | 2.8           | 3.9           | 3.6           | 3.4 ± 0.4       | 4.0 ± 1.1         |
| Arginine (R)                                     | 4.9           | 3.5           | 2.8           | 3.7 ± 0.9       | 3.6 ± 0.8         |
| Serine (S)                                       | 4.9           | 3.9           | 2.4           | 3.7 ± 1.0       | 5.1 ± 1.1         |
| Threonine (T)                                    | 4.5           | 4.3           | 7.2           | 5.3 ± 1.3       | 5.1 ± 0.9         |
| Valine (V)                                       | 8.9           | 9.7           | 8.8           | 9.1 ± 0.4       | 9.2 ± 1.1         |
| Tryptophan (W)                                   | 1.2           | 0.8           | 0.8           | 0.9 ± 0.2       | 1.5 ± 0.5         |
| Tyrosine (Y)                                     | 2.4           | 3.5           | 2.4           | 2.8 ± 0.5       | 2.0 ± 0.6         |
| <b>Physicochemical amino acid properties (%)</b> |               |               |               |                 |                   |
| Charged (DEHKR)                                  | 23.5          | 28.3          | 26.7          | 26.2 ± 2.0      | 24.4 ± 1.9        |
| Positively charged (HKR)                         | 10.5          | 13.6          | 12.4          | 12.1 ± 1.2      | 12.7 ± 1.3        |
| Negatively charged (DE)                          | 13.0          | 14.7          | 14.3          | 14.0 ± 0.8      | 11.6 ± 1.4        |
| Aliphatic (AGILPV)                               | 54.3          | 48.1          | 43.8          | 48.7 ± 4.3      | 47.5 ± 3.3        |
| Aromatic (FHXY)                                  | 6.1           | 8.9           | 8.0           | 7.7 ± 1.2       | 9.0 ± 0.8         |
| Polar (DEKNQR)                                   | 27.5          | 31.4          | 33.1          | 30.7 ± 2.3      | 30.1 ± 2.4        |
| Neutral, polar (CNQSTY)                          | 19.0          | 19.4          | 22.7          | 20.4 ± 1.7      | 21.8 ± 2.7        |
| Neutral, non-polar (AFGILMPVW)                   | 57.5          | 52.3          | 50.6          | 53.5 ± 2.9      | 53.8 ± 2.9        |
| Hydrophobic (CFILMVW)                            | 26.7          | 29.1          | 30.7          | 28.8 ± 1.6      | 31.0 ± 1.4        |
| Small size (ACGSTV)                              | 47.4          | 41.9          | 40.2          | 43.2 ± 3.1      | 41.8 ± 3.0        |
| Medium size (DEHILMNQ)                           | 40.1          | 41.9          | 43.4          | 41.8 ± 1.4      | 41.0 ± 2.9        |
| Large size (FKRWY)                               | 12.6          | 16.3          | 16.3          | 15.1 ± 1.8      | 17.2 ± 2.1        |

**Table S5.** Secondary structure elements and stabilizing interactions for IrrevTIMs and RevTIMs.

| Structural property                     | <i>Dr</i> TIM | <i>Sc</i> TIM | <i>Cp</i> TIM | Average RevTIMs | Average IrrevTIMs |
|-----------------------------------------|---------------|---------------|---------------|-----------------|-------------------|
| <b>Secondary structure elements (%)</b> |               |               |               |                 |                   |
| $\alpha$ -helix                         | 44            | 48            | 43            | 45.0 $\pm$ 2.2  | 44.9 $\pm$ 2.1    |
| $\beta$ -strand                         | 21            | 20            | 21            | 20.7 $\pm$ 0.5  | 21.8 $\pm$ 1.0    |
| Random coil                             | 35            | 32            | 36            | 34.3 $\pm$ 1.7  | 33.3 $\pm$ 1.8    |
| <b>Stabilizing interactions</b>         |               |               |               |                 |                   |
| Total H-bonds of the oligomer           | 490           | 503           | 510           | 501 $\pm$ 8     | 521 $\pm$ 24      |
| Interface H-bonds                       | 27            | 19            | 24            | 23 $\pm$ 3      | 28 $\pm$ 5        |
| Total salt bridges of the oligomer      | 37            | 50            | 44            | 44 $\pm$ 5      | 34 $\pm$ 7        |
| Interface salt bridges                  | 2             | 2             | 12            | 5 $\pm$ 5       | 6 $\pm$ 3         |

**Table S6.** Dimeric TIM PDB files used in the structural comparison of IrrevTIMs and RevTIMs.

| Organism                                  | Code          | PDB ID | Resolution (Å) | Spatial group                                  | Asymmetric unit <sup>a</sup> | Conformation of active site loops |           | Reference |
|-------------------------------------------|---------------|--------|----------------|------------------------------------------------|------------------------------|-----------------------------------|-----------|-----------|
|                                           |               |        |                |                                                |                              | Subunit A                         | Subunit B |           |
| <i>Clostridium perfringens</i>            | <i>Cp</i> TIM | 4Y8F   | 1.54           | C 1 2 1                                        | Monomer                      | Open                              | Open      | This work |
| <i>Deinococcus radiodurans</i>            | <i>Dr</i> TIM | 4Y90   | 2.10           | R 3 2                                          | Tetramer                     | Open                              | Open      | This work |
| <i>Entamoeba histolytica</i>              | <i>Et</i> TIM | 1M6J   | 1.50           | P 2 <sub>1</sub> 2 <sub>1</sub> 2              | Dimer                        | Open                              | Open      | 3         |
| <i>Escherichia coli</i>                   | <i>Ec</i> TIM | 4K6A   | 1.80           | P 2 <sub>1</sub> 2 <sub>1</sub> 2 <sub>1</sub> | Dimer                        | Open                              | Open      | 4         |
| <i>Gallus gallus</i>                      | <i>Gg</i> TIM | 1TPH   | 1.80           | P 2 <sub>1</sub> 2 <sub>1</sub> 2 <sub>1</sub> | Dimer                        | Closed                            | Closed    | 5         |
| <i>Gemmata obscuriglobus</i>              | <i>Go</i> TIM | 4Y96   | 1.58           | P 6 <sub>5</sub> 2 2                           | Dimer                        | Closed                            | Open      | This work |
| <i>Geobacillus stearothermophilus</i>     | <i>Gs</i> TIM | 1BTM   | 2.80           | P 2 <sub>1</sub> 2 <sub>1</sub> 2              | Dimer                        | Closed                            | Closed    | 6         |
| <i>Giardia lamblia</i>                    | <i>Gl</i> TIM | 2DP3   | 2.10           | I 2 2 2                                        | Monomer                      | Closed                            | Open      | 7         |
| <i>Homo sapiens</i>                       | <i>Hs</i> TIM | 2JK2   | 1.70           | P 2 <sub>1</sub> 2 <sub>1</sub> 2 <sub>1</sub> | Dimer                        | Open                              | Open      | 8         |
| <i>Leishmania mexicana</i>                | <i>Lm</i> TIM | 1AMK   | 1.83           | C 1 2 1                                        | Monomer                      | Closed                            | Closed    | 9         |
| <i>Moritella marina</i>                   | <i>Mm</i> TIM | 1AW2   | 2.65           | P 1 2 <sub>1</sub> 1                           | Dimer                        | Open                              | Open      | 10        |
| <i>Mycobacterium tuberculosis</i>         | <i>Mt</i> TIM | 3TA6   | 1.41           | C 1 2 1                                        | Dimer                        | Open                              | Open      | 11        |
| <i>Oryctolagus cuniculus</i>              | <i>Oc</i> TIM | 1R2R   | 1.50           | P 2 <sub>1</sub> 2 <sub>1</sub> 2 <sub>1</sub> | Dimer                        | Open                              | Open      | 12        |
| <i>Plasmodium falciparum</i>              | <i>Pf</i> TIM | 1YDV   | 2.20           | C 1 2 1                                        | Dimer                        | Open                              | Open      | 13        |
| <i>Saccharomyces cerevisiae</i>           | <i>Yt</i> TIM | 1NF0   | 1.60           | P 2 <sub>1</sub> 2 <sub>1</sub> 2 <sub>1</sub> | Dimer                        | Open                              | Closed    | 14        |
| <i>Streptomyces coelicolor</i>            | <i>Sc</i> TIM | 4Y9A   | 2.30           | P 4 <sub>3</sub>                               | Dimer                        | Open                              | Open      | This work |
| <i>Trichomonas vaginalis</i> <sup>b</sup> | <i>Tv</i> TIM | 3QSR   | 2.05           | P 2 2 <sub>1</sub> 2 <sub>1</sub>              | Monomer                      | Open                              | Open      | 15        |
| <i>Trypanosoma brucei</i>                 | <i>Tb</i> TIM | 5TIM   | 1.83           | P 2 <sub>1</sub> 2 <sub>1</sub> 2 <sub>1</sub> | Dimer                        | Open                              | Closed    | 16        |
| <i>Trypanosoma cruzi</i>                  | <i>Tc</i> TIM | 1TCD   | 1.83           | P 2 <sub>1</sub> 2 <sub>1</sub> 2 <sub>1</sub> | Dimer                        | Closed                            | Open      | 17        |

<sup>a</sup> The number of molecules in asymmetric unit was determined by the Matthews coefficient analysis by solvent content percentage in the crystal.

<sup>b</sup> Structural comparison of *Tv*TIM was realized with the three-dimensional structure of its dimeric Ile45 variant.

## References for Electronic Supplementary Information

1. T. Cavalier-Smith, *Biol. Direct.*, 2006, **1**, 1-19.
2. I. Letunic and P. Bork, *Nucleic Acids Res.*, 2011, **39**, W475-W478.
3. A. Rodríguez-Romero, A. Hernandez-Santoyo, L. del Pozo-Yauner, A. Kornhauser and D. A. Fernández-Velasco, *J. Mol. Biol.*, 2002, **322**: 669-75.
4. G. Minasov, M. Kuhn, A. Halavaty, L. Shuvalova, I. Dubrovskaya, J. Winsor, S. Grimshaw, W. F. Anderson and Center for Structural Genomics of Infectious Diseases, 2013, Forthcoming.
5. Z. Zhang, S. Sugio, E. A. Komives, K. D. Liu, J. R. Knowles, G. A. Petsko and D. Ringe, *Biochemistry*, 1994, **33**, 2830-2837.
6. L. F. Delboni, S. C. Mande, F. Reintier-Delrue, V. Mainfroid, S. Turtley, F. M. D. Vellieux, J. A. Martial and W. G. J. Hol, *Protein Sci.*, 1995, **4**, 2594-2604.
7. H. Reyes-Vivas, A. Díaz, J. Peón, G. Mendoza-Hernández, G. Hernández-Alcántara, I. de la Mora-de la Mora, S. Enríquez-Flores, L. Domínguez-Ramírez and G. López-Velázquez, *J. Mol. Biol.*, 2007, **365**, 752-763.
8. C. Rodríguez-Almazán, R. Arreola, D. Rodríguez-Larrea, B. Aguirre-López, M. T. de Gómez-Puyou, R. Pérez-Montfort, M. Costas, A. Gómez-Puyou and A. Torres-Larios, *J. Biol. Chem.*, 2008, **283**, 23254-23263.
9. J. C. Williams, J. P. Zeelen, G. Neubauer, G. Vriend, J. Backmann, P. A. Michels, A. M. Lambeir and R. K. Wierenga, *Protein Eng.*, 1999, **12**, 243-250.
10. M. Alvarez, J. P. Zeelen, V. Mainfroid, F. Reintier-Delrue, J. A. Martial, L. Wyns, R. K. Wierenga and D. Maes, *J. Biol. Chem.*, 1998, **273**, 2199-2206.
11. S. E. Connor, G. C. Capodagli, M. K. Deaton and S. D. Pegan, *Acta Crystallogr. D Biol. Crystallogr.*, 2011, **67**, 1017-1022.
12. R. Aparicio, S. T. Ferreira and I. Polikarpov, *J. Mol. Biol.*, 2003, **334**, 1023-1041.
13. S. S. Velanker, S. S. Ray, R. S. Gokhale, S. Suma, H. Balaram, P. Balaram and M. R. N. Murthy, *Structure*, 1997, **5**, 751-761.
14. G. Jögl, S. Rozovsky, A. E. McDermott and L. Tong, *Proc. Natl. Acad. Sci. U. S. A.*, 2003, **100**, 50-55.

15. S. Lara-González, P. Estrella-Hernández, A. Ochoa-Leyva, M. Del Carmen Portillo-Téllez, L. A. Caro-Gómez, E. E. Figueroa-Angulo, H. Salgado-Lugo, J. F. T. Miranda-Ozuna, J. Ortega-López, R. Arroyo, L. G. Brieba and C. B. Benítez-Cardoza, *Proteins*, 2014, **82**, 22-33.
16. R. K. Wierenga, M. E. M. Noble, G. Vriend and S. Nauche, *J. Mol. Biol.*, 1991, **220**, 995-1015.
17. E. Maldonado, M. Soriano-García, A. Moreno, N. Cabrera, G. Garza-Ramos, M. T. de Gómez-Puyou, A. Gómez-Puyou and R. Pérez-Montfort, *J. Mol. Biol.*, 1998, **283**: 193-203.
18. Y. Aguirre, N. Cabrera, B. Aguirre, R. Pérez-Montfort, A. Hernandez-Santoyo, H. Reyes-Vivas, S. Enríquez-Flores, M. T. de Gómez-Puyou, A. Gómez-Puyou, J. M. Sanchez-Ruiz and M. Costas, *Proteins*, 2014, **82**, 323-335.
19. M. Costas, D. Rodríguez-Larrea, L. De Maria, T. V. Borchert, A. Gómez-Poyou and J. M. Sanchez-Ruiz, *J. Mol. Biol.*, 2009, **385**, 924-937.
